# Supplementary material for: Identification of Intermediate-Size Non-Coding RNAs Involved in the UV-Induced DNA Damage Response in C. elegans
Source: PLoS One. 2012 Nov 7;7(11):e48066. doi: 10.1371/journal.pone.0048066 (PMC3492359; doi:10.1371/journal.pone.0048066)
Supplement: Table S3 — The detected expression levels of 57 UV-DDR-related is-ncRNA candidates in the RNA-Seq and microarray. (XLS) [file pone.0048066.s007.xls]

## Sheet: Sheet1
chrom	start	stop	strand	Name	SN20	SN2100	SRB8640	MN20	MN2100	MRB8640	MRB864100	location	PhastCons
chrIV	13600815	13600893	+	CeN31_AY948625_ncRNA117	1.45071	1.41643	3.05714	5.07714	3.14714	5.12571	4.02286	intergenic	0.626772
chrI	5707049	5707122	+	CeN53_AY948688_ncRNA134	5.09286	1.41643	3.76286	11.7671	6.5	11.7671	7.81286	intergenic	0.94773
chrIV	13601604	13601693	+	CeN112_AY948610_ncRNA170	0.854286	0.841429	1.93714	4.61143	2.55429	4.48571	3.51143	intergenic	0
chrI	6024939	6025009	-	ncRNA191	6.62929	6.34857	7.97357	2.15071	1.43286	2.58071	2.13714	anti-intron	0.579225
chrI	6101678	6101736	-	ncRNA192_Region7355	5.84357	2.38571	2.83714	1.44143	0.302857	0.577143	1.80714	overlap	0.628136
chrI	8916824	8916894	-	ncRNA200	3.03	1.41643	0.981429	1.40643	0.474286	1.00643	0.775714	anti-intron	0.373845
chrII	4789127	4789197	-	ncRNA213	0.854286	1.89857	4.15571	0.577143	1.19286	1.28357	0.637857	intergenic	0
chrII	7104550	7104620	-	ncRNA220	3.03	2.16571	3.05714	1.42357	0.864286	1.87	1.39143	intron	0.875056
chrII	8987913	8987983	-	ncRNA224	4.89429	6.02429	1.93714	0.784286	1.37429	0.847143	0.485	overlap	0.846254
chrII	9651625	9651695	-	ncRNA226	6.35143	3.42643	3.76286	1.93714	0.887143	1.28357	1.01214	overlap	0.57731
chrII	12805970	12806040	-	ncRNA234	2.18929	8.95429	3.05714	1.38429	2.45286	1.62143	2.15286	anti-intron	0.100155
chrII	14357929	14357999	-	ncRNA236	3.76643	1.89857	3.43143	0.978571	0.495714	0.864286	1.97714	intergenic	0.53531
chrIII	2045171	2045241	-	ncRNA243	3.03	2.38571	3.43143	1.39857	0.841429	1.75429	1.86143	intron	0.679901
chrIII	8126940	8127010	-	ncRNA256	4.655	2.80143	2.54714	1.02857	0.678571	0.432857	1.35714	intergenic	0.526282
chrIV	2409350	2409420	-	ncRNA267	5.09286	6.56571	8.98857	0.217143	0.987143	1.87	0.775714	anti-intron	0.236662
chrIV	3701465	3701535	-	ncRNA268	2.18929	2.80143	6.24714	1.19571	1.88	1.40714	1.02286	intergenic	0.532521
chrIV	4538698	4538912	-	ncRNA272_Region59580	13.9643	13.3586	12.5786	5.12357	2.78857	5.09286	3.37714	anti-intron	0.587551
chrIV	5796723	5796793	-	ncRNA275	3.455	4.09714	1.93714	0.825714	1.75143	1.46286	1.80714	overlap	0
chrIV	7294139	7294209	-	ncRNA279	1.45071	3.42643	0.981429	0.882857	1.62143	0.984286	1.62429	intergenic	0.416338
chrIV	8205092	8205162	-	ncRNA282	1.45071	5.09286	6.24714	0.978571	1.89	1.87	2.53	intron	0.278465
chrIV	9688301	9688371	-	ncRNA293	2.52286	3.75429	2.54714	0.385714	1.89857	1.85214	1.43143	intergenic	0.396113
chrIV	14838272	14838342	-	ncRNA307	2.52286	4.66143	0.981429	0.761429	2.41143	1.87929	1.74429	anti-intron	0
chrV	4784981	4785427	-	ncRNA317	0.854286	4.39714	0.981429	2.72857	6.46143	2.51714	6.04	anti-intron	0
chrV	8544875	8545184	-	ncRNA324	3.455	6.22286	5.45857	0.925714	2.64286	1.03571	2.60786	intron	0.49469
chrV	13722684	13722754	-	ncRNA341	0.854286	5.25714	0.981429	1.74	4.28	3.49286	4.115	overlap	0.00084507
chrV	14127834	14127904	-	ncRNA342	7.37643	7.89714	8.635	0.302857	0.746429	1.42	0.217143	anti-intron	0.424662
chrV	17488970	17489040	-	ncRNA348	3.03	6.68714	1.93714	0.495714	0.941429	1.44286	0.677143	intergenic	0
chrX	3102975	3103045	-	ncRNA356	5.67	2.16571	1.93714	1.37286	0.642857	2.16	0.55	intergenic	0.82969
chrX	3249714	3249784	-	ncRNA358	2.18929	1.89857	4.655	3.39429	2.03	3.37714	0.852857	intergenic	0.921789
chrX	14015124	14015314	-	ncRNA377	1.45071	5.49143	3.05714	2.15071	4.89429	1.42714	2.90643	intergenic	0.782197
chrI	1958724	1958794	+	ncRNA382	1.45071	5.42143	0.981429	1.39571	2.09857	4.63714	1.41	intergenic	0.627169
chrI	3601293	3601363	+	ncRNA386	4.12	2.80143	2.54714	2.55429	1.45429	2.14286	1.45714	intergenic	0.15193
chrI	6347004	6347271	+	ncRNA392_Region7686	4.89429	1.41643	4.95714	2.19714	1.35714	2.41143	2.205	intron	0.672541
chrI	7330375	7330445	+	ncRNA395	5.55214	0.841429	3.05714	2.74286	0.522857	2.15143	1.96786	intergenic	0.791
chrI	7562365	7562435	+	ncRNA396	0.854286	1.41643	4.655	0.853571	1.61571	0.642857	0.997143	intergenic	0.267211
chrI	8680381	8680545	+	ncRNA398_Region10779	2.76571	5.75429	3.43143	1.61286	3.09	2.44929	3.07857	anti-intron	0.230903
chrI	10122215	10122285	+	ncRNA403	2.52286	3.42643	4.655	0.632857	1.62714	2.13714	0.864286	intergenic	0.156775
chrI	13387253	13387323	+	ncRNA411	1.45071	2.16571	6.00857	2.37357	4.15571	2.17143	2.55	intergenic	0.362155
chrII	2927815	2928148	+	ncRNA415_Region21220	1.45071	4.09714	0.981429	3.39429	5.57429	4.19857	3.79857	intergenic	0
chrII	12965541	12965611	+	ncRNA437	7.37643	4.09714	3.43143	2.92571	0.975714	2.65357	1.62429	intergenic	0.842563
chrIII	8772644	8772880	+	ncRNA456	0.854286	2.80143	3.29643	1.40643	3.37714	1.03571	3.54286	intron	0.259972
chrIV	6536175	6536245	+	ncRNA483	2.18929	4.09714	1.93714	0.911429	1.40643	1.01929	0.818571	overlap	0
chrIV	11497427	11497497	+	ncRNA490	4.655	2.16571	0.981429	1.96143	0.911429	1.43143	1.45714	anti-intron	0
chrIV	12365250	12365320	+	ncRNA491	3.455	3.08571	0.981429	1.87143	0.302857	1.89714	1.40571	intron	0.950239
chrV	6390446	6390516	+	ncRNA506	8.33714	6.87143	1.93714	1.41286	0.618571	1.44286	2.36143	overlap	0.230507
chrX	8022855	8022925	+	ncRNA533_Region104551	5.84357	2.38571	1.93714	1.76143	0.797143	2.52429	2.19571	intron	0.496873
chrX	3455908	3455978	-	ncRNA562	4.12	1.89857	1.93714	5.14714	2.41143	2.36714	2.88	intron	0.960676
chrIII	4369446	4369738	-	Other|B0285.12;293nt_ncRNA84	0.854286	0.841429	0.981429	5.94857	2.38	6.29143	4.49714	anti-intron	0.900212
chrV	12491257	12491323	-	snoRNA|W04D2.7;67nt_ncRNA22	11.4786	12.5786	12.1671	9.41857	7.89714	9.44143	7.43286	anti-intron	0.992672
chrV	13722910	13723003	-	Other|F35E12.11;94nt_ncRNA24	1.92357	3.08571	1.93714	3.72571	5.30571	3.08571	5.53857	anti-intron	0.553904
chrII	5105140	5105214	-	snoRNA|C04G6.12;75nt_ncRNA38	4.12	12.05	11.7171	10.7214	8.64571	10.4471	8.58	anti-intron	0.925787
chrIV	9334606	9334698	-	snRNA|T20D3.12;93nt_ncRNA67	8.4	9.38	8.87214	11.065	7.99286	10.6871	8.935	intron	0.980473
chrIII	11371238	11371305	-	T28D6.10;68nt_ncRNA95	6.35143	6.73	6.24714	9.74571	7.51429	9.50429	7.53857	intron	0.957706
chrII	13834358	13834432	-	CeN71_AY948635_ncRNA148	5.09286	5.09286	5.71643	9.85571	7.89714	9.92857	8.17	intergenic	0
chrI	15050292	15050362	-	ncRNA207	0.854286	1.41643	4.15571	2.37357	0.767143	2.19714	0.432857	intron	0.810789
chrX	1208070	1208263	+	ncRNA524_Region97278	4.41143	2.80143	2.54714	3.11929	4.71429	3.39714	4.89429	intergenic	0.010949
chrX	14761478	14761548	+	ncRNA551	3.03	2.80143	0.981429	0.978571	1.42	1.98071	2.895	intergenic	0.0122254
Note:
1. The lines represents the ncRNA candidatas which are further screened with GRSN methods are green-labled.
2. The columns 'S' represents Sequencing data,while the 'M' represents Microarray data.
3.CeNxx is the noncoding RNA identified in our previous work published on the Genome Res journal.
4. Region_xxx is the intermiate-sized TUF identified in our previous work published on the NAR journal.
